# Supplementary material for: The long-term cardiovascular safety and efficacy of glucagon-like peptide-1 (GLP-1) receptor agonists in high-risk cardiovascular populations: A systematic review and meta-analysis
Source: Research Square preprint supplement (doi:10.21203/rs.3.rs-8788582/v1), 2026-02-11
Supplement: Supplementary file 3 [file 6c2c53ef3f67b6d4941f8e71.docx]

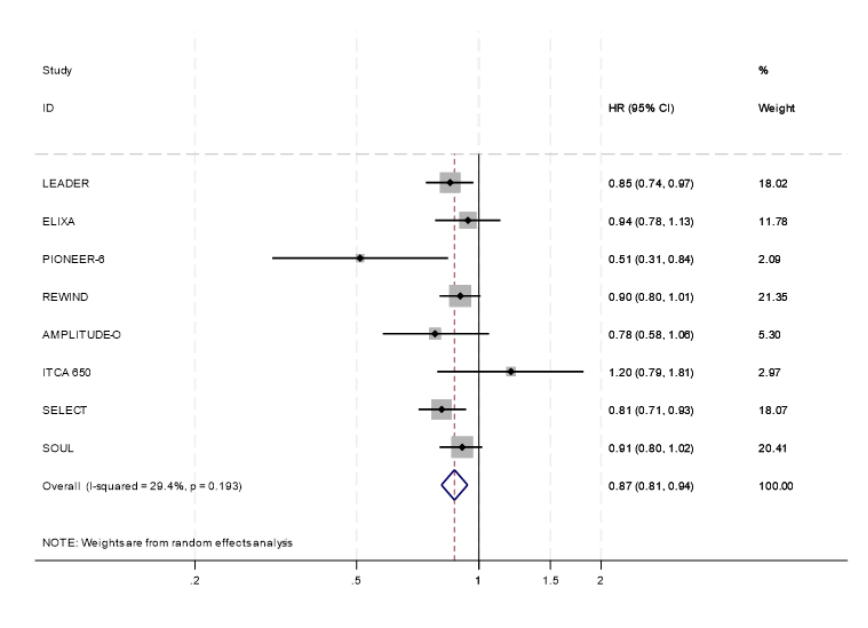


**Figure 1: Forest plot diagram between GLP-1 receptor agonists and placebo for all-cause mortality according to random effects analysis.**


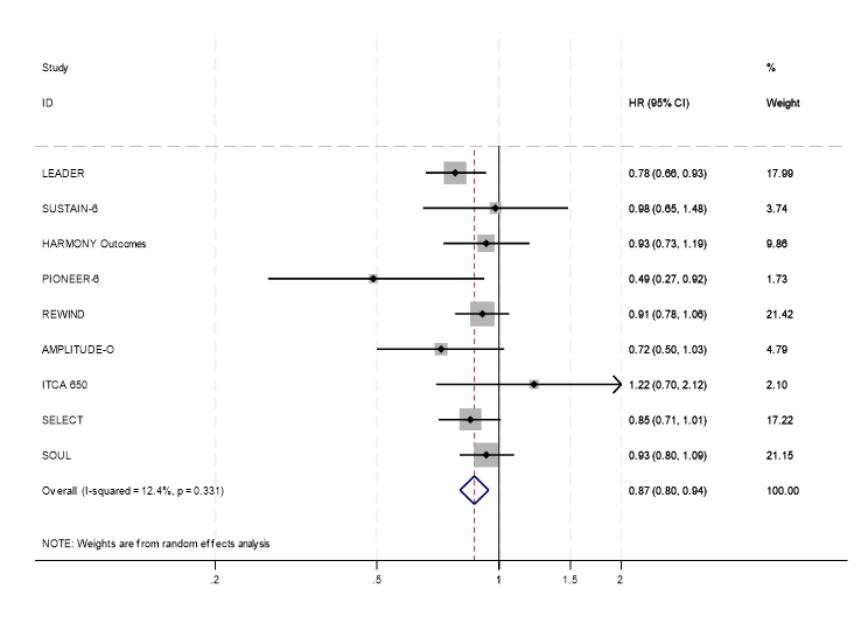


**Figure 2: Forest plot diagram between GLP-1 receptor agonists and placebo for cardiovascular death according to random effects analysis.**


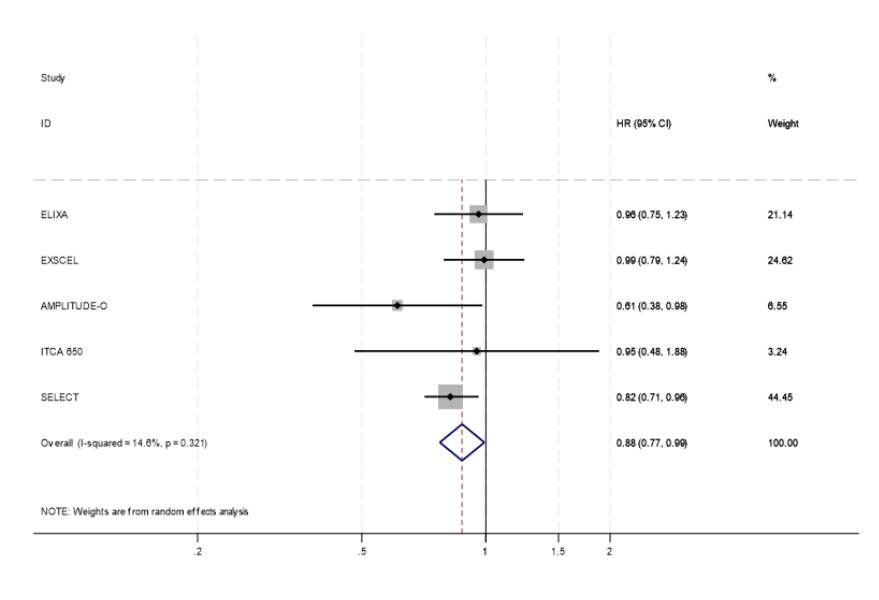


**Figure 3: Forest plot diagram between GLP-1 receptor agonists and placebo for heart failure hospitalisation according to random effects analysis.**


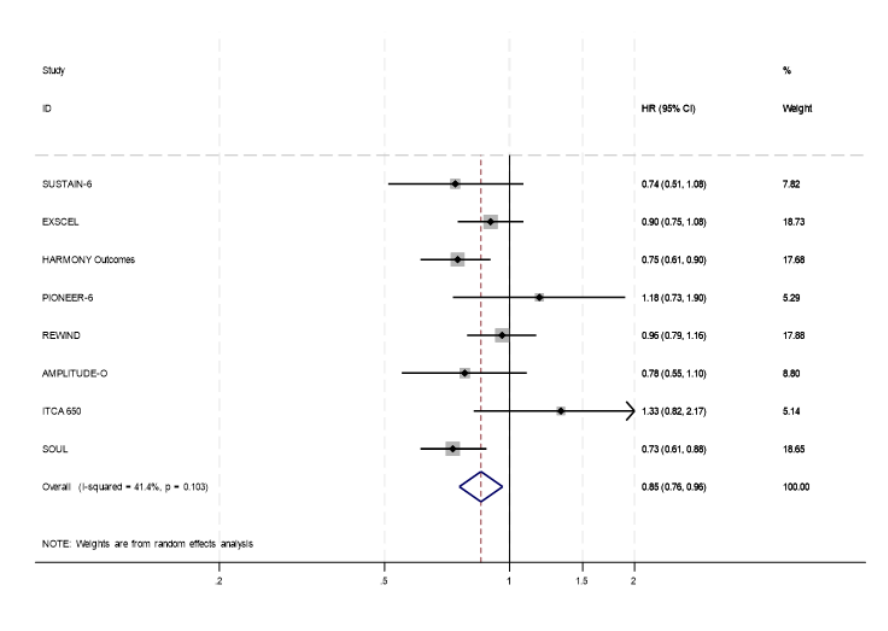


**Figure 4: Forest plot diagram between GLP-1 receptor agonists and placebo for non-fatal myocardial infarction according to random effects analysis.**


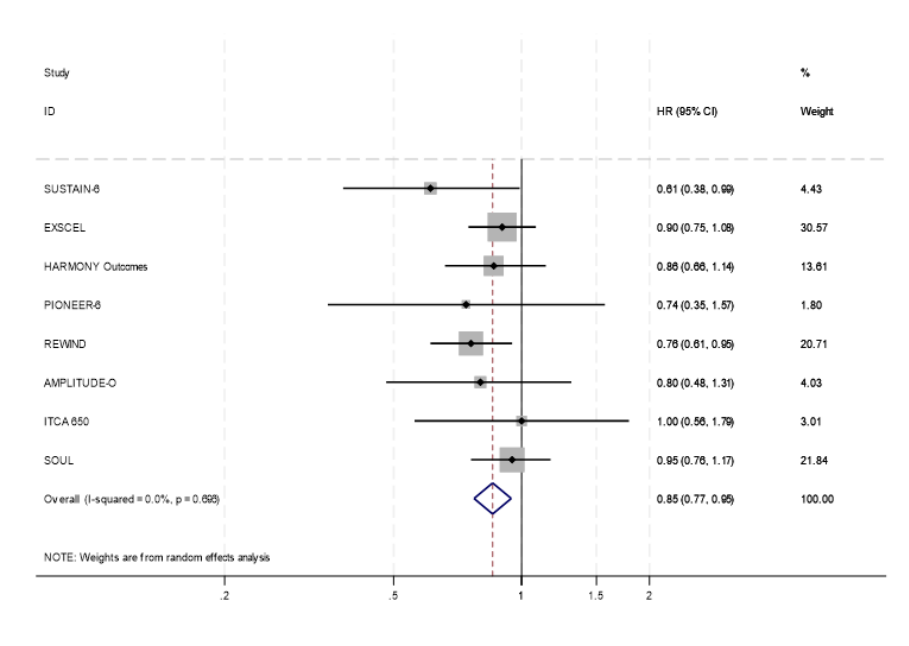
  **Figure 5: Forest plot diagram between GLP-1 receptor agonists and placebo for non-fatal stroke according to random effects analysis.**
